# Supplementary material for: Investigation of the Efficacy and Safety of 650 nm Low-Level Red Light for Myopia Control in Children: A Randomized Controlled Trial
Source: PubMed Central journal article supplement — Ophthalmol Ther. 2022 Oct 8;11(6):2259–70. doi: 10.1007/s40123-022-00585-w (PMC9587157; doi:10.1007/s40123-022-00585-w), 2022-10-08
Supplement: 40123_2022_585_MOESM1_ESM.pdf [file 40123_2022_585_MOESM1_ESM.pdf]

**Supplementary Material for manuscript entitled  
“Investigation of the Efficacy and Safety of 650nm  
Low-Level Red-Light for Myopia Control in Children:  
A Randomized Controlled Trial”**

Lei Tian<sup>1,2#</sup>, Kai Cao<sup>1#</sup>, Dong-Li Ma<sup>2</sup>, Shi-Qiang Zhao<sup>2</sup>, Li-Xin Lu<sup>2</sup>, Ao Li<sup>2</sup>,

Chang-Xi Chen<sup>1</sup>, Chun-Rong Ma<sup>2</sup>, Zhang-Fang Ma<sup>2</sup>, Ying Jie<sup>1,2\*</sup>

<sup>1</sup>Beijing Institute of Ophthalmology, Beijing Tongren Hospital, Capital Medical University, Beijing 100730, China.

<sup>2</sup>Beijing Tongren Eye Center, Beijing Tongren Hospital, Capital Medical University, Beijing 100730, China.

**Corresponding to Ying Jie.** Email: jie\_yingcn@aliyun.com. Address: No.17, Hougou alley, Dongcheng District, Beijing.

**The details of the medical device used for low-level red-light intervention in this clinical trial.**

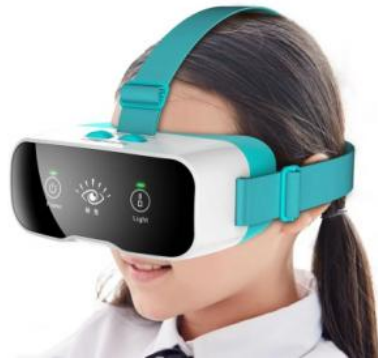

Figure1 Part A

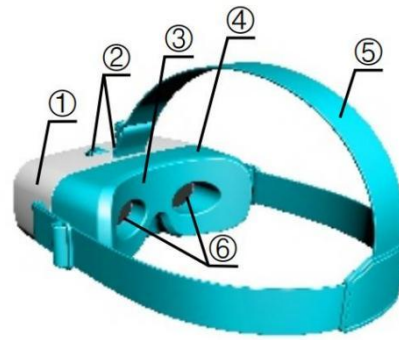

Figure1 Part B

Figure1 Part A: Schematic diagram of wearing during treatment; Figure1 Part B: Schematic diagram of equipment construction.

- ① The main body, carries each functional devices.
- ② Pupil distance wheel, to achieve the best intervention effect, user could adjust pupil distance wheel to focus two light spot fusion into one light spot.
- ③ The sensor area, which detects whether the user is wearing the device and record the time of using.
- ④ Eye mask, when using the device, the eye mask can cover the eyes well and prevent interference from external light.
- ⑤ Fixed belt, which helps fix the device on the user's head.
- ⑥ Light source window, from which the light beam is emitted.
